# Supplementary material for: Residue cytotoxicity of a hydrazone-linked polymer–drug conjugate: implication for acid-responsive micellar drug delivery
Source: Royal Society of Chemistry journal article supplement (doi:10.1039/c5ra02097b), 2015-01-01
Supplement: c5ra02097b1.pdf [file c5ra02097b1.pdf]

**Supporting Information for:**

**Residue cytotoxicity of hydrazone-linked polymer-drug conjugate:  
Implication for acid-responsive micellar drug delivery**

Yu Zhang, Min Gao, Chao Chen, Zheng Wang\* and Yanjun Zhao\*

School of Pharmaceutical Science and Technology, Tianjin Key Laboratory for Modern Drug  
Delivery & High Efficiency, Collaborative Innovation Center of Chemical Science and Engineering,  
Tianjin University , Tianjin, 300072

\* To whom correspondence should be addressed.

Dr. Yanjun Zhao; Prof. Zheng Wang

School of Pharmaceutical Science & Technology, Tianjin University

92 Weijin Road, Nankai District, Tianjin 300072, China

Tel: +86-22-2740 7882, Fax: +86-22-2740 4018

Email: zhaoyj@tju.edu.cn; wangzheng2006@tju.edu.cn

**Table S1.** Summary of the IC<sub>50</sub> data of curcumin (Cur), its derivative (Cur-L) and pH-responsive polymer-Cur and pH-insensitive (ester-linked) conjugate in HeLa cells.

| <b>Sample</b>         | <b>IC<sub>50</sub> (μM)</b> |
|-----------------------|-----------------------------|
| Cur                   | 35.9 ± 4.6                  |
| Cur-L                 | 37.1 ± 4.5                  |
| Conjugate (hydrazone) | 170.4 ± 10.3                |
| Conjugate (ester)     | 64.0 ± 9.3                  |
